# Supplementary material for: Molecular properties and excited state van der Waals potentials in the NO A2Σ+ + O2 XΣg− collision complex
Source: Royal Society of Chemistry journal article supplement (doi:10.1039/d1cp05286a), 2022-01-01
Supplement: d1cp05286a1.pdf [file d1cp05286a1.pdf]

Supplementary information:

Table of Content:

Figure 1: The NO 4  $\sigma$  orbital obtained from SA(3)-CASSCF(9,7)/aug-cc-pVTZ-333 calculation, using an iso-density values of (a) 0.025, (b) 0.030, and (c) 0.035 a.u. from left to right.....2

Table 1: Basis functions exponents computed in an even-tempered manner from the aug-cc-pVTZ basis set.....2

Table 2: Finite field RCCSD(T) dipole moment  $\mu_z$  (Debye) and polarizability ( $a_0^3$ ) of NO  $X^2 \Pi$  with ET-augmented basis sets. The nitric oxide molecule was aligned along the z-axis, and the isotropic polarizability  $\langle\alpha\rangle$  was taken as the average of the trace values  $\alpha_{xx}$ ,  $\alpha_{yy}$  and  $\alpha_{zz}$ .....3

Table 3: Finite field RCCSD(T) dipole moment  $\mu_z$  (Debye) and polarizability ( $a_0^3$ ) of NO  $A^2 \Sigma^+$  with ET-augmented basis sets. The nitric oxide molecule was aligned along the z-axis, and the isotropic polarizability  $\langle\alpha\rangle$  was taken as the average of the trace values  $\alpha_{xx}$ ,  $\alpha_{yy}$  and  $\alpha_{zz}$ .....4

Figure 1: The NO  $4\sigma$  orbital obtained from SA(3)-CASSCF(9,7)/aug-cc-pVTZ-333 calculation, using an iso-density values of (a) 0.025, (b) 0.030, and (c) 0.035 a.u. from left to right.

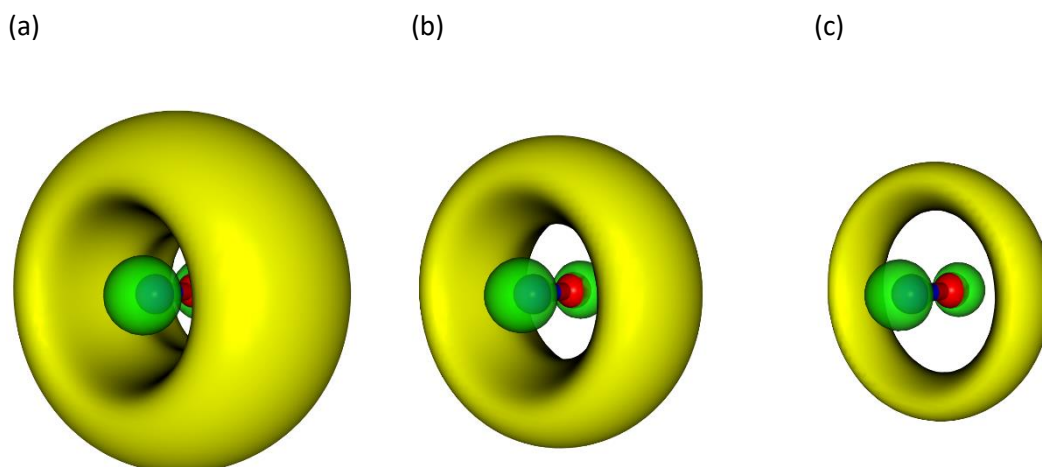

Table 1: Basis functions exponents computed in an even-tempered manner from the aug-cc-pVTZ basis set.

|          | Angular moment | 1       | 2       | 3       |
|----------|----------------|---------|---------|---------|
| nitrogen | <i>s</i>       | 0.01857 | 0.00598 | 0.00193 |
|          | <i>p</i>       | 0.01398 | 0.00398 | 0.00113 |
|          | <i>d</i>       | 0.04862 | 0.01565 | 0.00504 |
| oxygen   | <i>s</i>       | 0.02282 | 0.00706 | 0.00218 |
|          | <i>p</i>       | 0.01668 | 0.00466 | 0.00130 |
|          | <i>d</i>       | 0.07100 | 0.02356 | 0.00782 |

Table 2: Finite field RCCSD(T) dipole moment  $\mu_z$  (Debye) and polarizability ( $a_0^3$ ) of NO  $X^2 \Pi$  with ET-augmented basis sets. The nitric oxide molecule was aligned along the z-axis, and the isotropic polarizability  $\langle\alpha\rangle$  was taken as the average of the trace values  $\alpha_{xx}$ ,  $\alpha_{yy}$  and  $\alpha_{zz}$ .

| Method          | Basis set       | $\mu_z$         | $\alpha_{xx}$ | $\alpha_{yy}$ | $\alpha_{zz}$ | $\langle\alpha\rangle$ |
|-----------------|-----------------|-----------------|---------------|---------------|---------------|------------------------|
| CCSD            | aug-cc-pVTZ-100 | -0.122          | 9.01          | 9.78          | 15.01         | 11.27                  |
|                 | aug-cc-pVTZ-200 | -0.122          | 9.01          | 9.79          | 15.01         | 11.27                  |
|                 | aug-cc-pVTZ-300 | -0.122          | 9.01          | 9.79          | 15.01         | 11.27                  |
|                 | aug-cc-pVTZ-110 | -0.122          | 9.01          | 9.79          | 15.01         | 11.27                  |
|                 | aug-cc-pVTZ-210 | -0.122          | 9.01          | 9.8           | 15.01         | 11.27                  |
|                 | aug-cc-pVTZ-310 | -0.122          | 9.01          | 9.8           | 15.01         | 11.28                  |
|                 | aug-cc-pVTZ-220 | -0.122          | 9.01          | 9.8           | 15.01         | 11.28                  |
|                 | aug-cc-pVTZ-320 | -0.122          | 9.01          | 9.8           | 15.02         | 11.28                  |
|                 | aug-cc-pVTZ-330 | -0.122          | 9.02          | 9.8           | 15.02         | 11.28                  |
|                 | aug-cc-pVTZ-111 | -0.121          | 9.17          | 9.98          | 15.14         | 11.43                  |
|                 | aug-cc-pVTZ-211 | -0.121          | 9.17          | 9.98          | 15.14         | 11.43                  |
|                 | aug-cc-pVTZ-311 | -0.121          | 9.17          | 9.98          | 15.14         | 11.43                  |
|                 | aug-cc-pVTZ-221 | -0.121          | 9.17          | 9.98          | 15.14         | 11.43                  |
|                 | aug-cc-pVTZ-222 | -0.122          | 9.17          | 9.99          | 15.13         | 11.43                  |
|                 | aug-cc-pVTZ-321 | -0.121          | 9.17          | 9.98          | 15.14         | 11.43                  |
|                 | aug-cc-pVTZ-331 | -0.121          | 9.17          | 9.98          | 15.14         | 11.43                  |
|                 | aug-cc-pVTZ-322 | -0.122          | 9.17          | 9.99          | 15.13         | 11.43                  |
|                 | aug-cc-pVTZ-332 | -0.122          | 9.17          | 9.99          | 15.13         | 11.43                  |
|                 | aug-cc-pVTZ-333 | -0.122          | 9.17          | 9.99          | 15.13         | 11.43                  |
|                 | CCSD(T)         | aug-cc-pVTZ-100 | -0.167        | 9.12          | 9.97          | 15.04                  |
| aug-cc-pVTZ-200 |                 | -0.167          | 9.12          | 9.97          | 15.04         | 11.38                  |
| aug-cc-pVTZ-300 |                 | -0.167          | 9.12          | 9.97          | 15.04         | 11.38                  |
| aug-cc-pVTZ-110 |                 | -0.166          | 9.13          | 9.97          | 15.05         | 11.38                  |
| aug-cc-pVTZ-210 |                 | -0.166          | 9.13          | 9.98          | 15.05         | 11.38                  |
| aug-cc-pVTZ-310 |                 | -0.166          | 9.13          | 9.98          | 15.05         | 11.39                  |
| aug-cc-pVTZ-220 |                 | -0.166          | 9.13          | 9.98          | 15.05         | 11.39                  |
| aug-cc-pVTZ-320 |                 | -0.166          | 9.13          | 9.99          | 15.05         | 11.39                  |
| aug-cc-pVTZ-330 |                 | -0.166          | 9.13          | 9.99          | 15.05         | 11.39                  |
| aug-cc-pVTZ-111 |                 | -0.165          | 9.29          | 10.18         | 15.19         | 11.55                  |
| aug-cc-pVTZ-211 |                 | -0.165          | 9.29          | 10.18         | 15.19         | 11.55                  |
| aug-cc-pVTZ-311 |                 | -0.165          | 9.29          | 10.18         | 15.19         | 11.56                  |
| aug-cc-pVTZ-221 |                 | -0.165          | 9.29          | 10.18         | 15.19         | 11.55                  |
| aug-cc-pVTZ-222 |                 | -0.166          | 9.30          | 10.18         | 15.17         | 11.55                  |
| aug-cc-pVTZ-321 |                 | -0.165          | 9.29          | 10.18         | 15.19         | 11.55                  |
| aug-cc-pVTZ-331 |                 | -0.165          | 9.29          | 10.18         | 15.19         | 11.55                  |
| aug-cc-pVTZ-322 |                 | -0.166          | 9.30          | 10.19         | 15.17         | 11.55                  |
| aug-cc-pVTZ-332 |                 | -0.166          | 9.30          | 10.19         | 15.17         | 11.55                  |
| aug-cc-pVTZ-333 |                 | -0.166          | 9.30          | 10.19         | 15.17         | 11.55                  |

Table 3: Finite field RCCSD(T) dipole moment  $\mu_z$  (Debye) and polarizability ( $a_0^3$ ) of NO  $A^2 \Sigma^+$  with ET-augmented basis sets. The nitric oxide molecule was aligned along the z-axis, and the isotropic polarizability  $\langle\alpha\rangle$  was taken as the average of the trace values  $\alpha_{xx}$ ,  $\alpha_{yy}$  and  $\alpha_{zz}$ .

| Method          | Basis set       | $\mu_z$         | $\alpha_{xx}$ | $\alpha_{yy}$ | $\alpha_{zz}$ |
|-----------------|-----------------|-----------------|---------------|---------------|---------------|
| CCSD            | aug-cc-pVTZ-100 | 1.08            | 288.40        | 444.39        | 340.40        |
|                 | aug-cc-pVTZ-200 | 1.12            | 286.96        | 467.67        | 347.19        |
|                 | aug-cc-pVTZ-300 | 1.12            | 287.67        | 468.02        | 347.79        |
|                 | aug-cc-pVTZ-110 | 1.09            | 609.29        | 444.93        | 554.50        |
|                 | aug-cc-pVTZ-210 | 1.11            | 616.49        | 445.93        | 559.64        |
|                 | aug-cc-pVTZ-310 | 1.11            | 616.67        | 445.36        | 559.57        |
|                 | aug-cc-pVTZ-220 | 1.10            | 617.41        | 447.40        | 560.74        |
|                 | aug-cc-pVTZ-320 | 1.10            | 616.06        | 447.43        | 559.85        |
|                 | aug-cc-pVTZ-330 | 1.10            | 616.08        | 448.07        | 560.07        |
|                 | aug-cc-pVTZ-111 | 1.08            | 616.85        | 448.81        | 560.84        |
|                 | aug-cc-pVTZ-211 | 1.09            | 623.93        | 449.24        | 565.70        |
|                 | aug-cc-pVTZ-311 | 1.09            | 623.93        | 448.92        | 565.59        |
|                 | aug-cc-pVTZ-221 | 1.09            | 623.68        | 449.18        | 565.52        |
|                 | aug-cc-pVTZ-222 | 1.09            | 626.29        | 449.87        | 567.48        |
|                 | aug-cc-pVTZ-321 | 1.09            | 623.72        | 450.00        | 565.82        |
|                 | aug-cc-pVTZ-331 | 1.09            | 623.54        | 449.55        | 565.54        |
|                 | aug-cc-pVTZ-322 | 1.08            | 624.28        | 450.96        | 566.51        |
|                 | aug-cc-pVTZ-332 | 1.09            | 626.20        | 449.93        | 567.44        |
|                 | aug-cc-pVTZ-333 | 1.08            | 626.12        | 450.54        | 567.59        |
|                 | CCSD(T)         | aug-cc-pVTZ-100 | 1.02          | 283.16        | 416.59        |
| aug-cc-pVTZ-200 |                 | 1.05            | 283.13        | 435.34        | 333.87        |
| aug-cc-pVTZ-300 |                 | 1.04            | 283.42        | 435.33        | 334.05        |
| aug-cc-pVTZ-110 |                 | 1.02            | 575.72        | 416.99        | 522.81        |
| aug-cc-pVTZ-210 |                 | 1.03            | 582.25        | 417.38        | 527.29        |
| aug-cc-pVTZ-310 |                 | 1.03            | 581.55        | 418.66        | 527.25        |
| aug-cc-pVTZ-220 |                 | 1.03            | 584.71        | 422.24        | 530.55        |
| aug-cc-pVTZ-320 |                 | 1.03            | 580.63        | 418.51        | 526.59        |
| aug-cc-pVTZ-330 |                 | 1.03            | 581.13        | 418.84        | 527.03        |
| aug-cc-pVTZ-111 |                 | 1.00            | 583.46        | 419.12        | 528.68        |
| aug-cc-pVTZ-211 |                 | 1.01            | 589.77        | 419.63        | 533.06        |
| aug-cc-pVTZ-311 |                 | 1.01            | 590.33        | 419.18        | 533.28        |
| aug-cc-pVTZ-221 |                 | 1.01            | 589.96        | 420.74        | 533.55        |
| aug-cc-pVTZ-222 |                 | 1.01            | 591.59        | 420.56        | 534.58        |
| aug-cc-pVTZ-321 |                 | 1.01            | 589.80        | 420.58        | 533.39        |
| aug-cc-pVTZ-331 |                 | 1.01            | 589.35        | 420.14        | 532.94        |
| aug-cc-pVTZ-322 |                 | 1.01            | 591.44        | 420.75        | 534.54        |
| aug-cc-pVTZ-332 |                 | 1.01            | 590.76        | 421.17        | 534.23        |
| aug-cc-pVTZ-333 |                 | 1.01            | 592.02        | 421.18        | 535.08        |
